# Supplementary material for: Conservation Status of North American Birds in the Face of Future Climate Change
Source: PLoS One. 2015 Sep 2;10(9):e0135350. doi: 10.1371/journal.pone.0135350 (PMC4558014; doi:10.1371/journal.pone.0135350)
Supplement: S2 Appendix — Projected changes in the number of species occupying in US states (except Hawaii) and provinces in Canada. There are 36 sets of projections for each place (2 seasons × 2 responses (gains/losses) × 3 time periods (2020, 2050, 2080) × 3 climate change scenarios (A2, A1B, B2). Values represent the mean change (gain or loss) within each State or Province. (XLSX) [file pone.0135350.s002.xlsx]

## Sheet: S2. Change States and Provinces
STATE_OR_PROVINCE	2020_A1B_kappa_gains_BBS	2020_A1B_kappa_gains_CBC	2020_A1B_kappa_losses_BBS	2020_A1B_kappa_losses_CBC	2020_A2_kappa_gains_BBS	2020_A2_kappa_gains_CBC	2020_A2_kappa_losses_BBS	2020_A2_kappa_losses_CBC	2020_B2_kappa_gains_BBS	2020_B2_kappa_gains_CBC	2020_B2_kappa_losses_BBS	2020_B2_kappa_losses_CBC	2050_A1B_kappa_gains_BBS	2050_A1B_kappa_gains_CBC	2050_A1B_kappa_losses_BBS	2050_A1B_kappa_losses_CBC	2050_A2_kappa_gains_BBS	2050_A2_kappa_gains_CBC	2050_A2_kappa_losses_BBS	2050_A2_kappa_losses_CBC	2050_B2_kappa_gains_BBS	2050_B2_kappa_gains_CBC	2050_B2_kappa_losses_BBS	2050_B2_kappa_losses_CBC	2080_A1B_kappa_gains_BBS	2080_A1B_kappa_gains_CBC	2080_A1B_kappa_losses_BBS	2080_A1B_kappa_losses_CBC	2080_A2_kappa_gains_BBS	2080_A2_kappa_gains_CBC	2080_A2_kappa_losses_BBS	2080_A2_kappa_losses_CBC	2080_B2_kappa_gains_BBS	2080_B2_kappa_gains_CBC	2080_B2_kappa_losses_BBS	2080_B2_kappa_losses_CBC
Manitoba	11.1657	2.94667	-13.0707	-2.53449	12.8132	3.22431	-11.5015	-2.52503	14.4649	4.04356	-13.0547	-2.66315	24.9355	8.93272	-15.5987	-3.79228	25.7717	9.53	-16.6528	-4.4683	25.086	9.68005	-16.528	-4.34413	37.1518	16.127	-23.7419	-5.80406	43.6165	22.6197	-28.4209	-8.44195	35.379	16.1136	-22.3052	-6.63262
Saskatchewan	11.1447	3.46043	-11.6847	-2.82493	11.3008	3.46089	-10.319	-2.8092	13.5105	4.21662	-10.0958	-2.83089	22.326	9.89856	-15.5238	-3.89948	21.3842	10.6742	-15.5333	-4.26612	20.9998	11.7702	-16.9942	-4.72181	29.2288	18.7126	-23.273	-6.38252	33.4542	25.9957	-26.5773	-8.99007	29.4033	18.4392	-21.1499	-7.14513
Minnesota	13.8257	8.22408	-13.8777	-5.97025	14.1715	10.4849	-14.6058	-5.88424	15.1348	12.1223	-15.6639	-6.54533	18.4649	20.6346	-21.7503	-7.89261	20.3491	24.4444	-23.437	-8.46815	22.7931	25.775	-23.2157	-8.60112	24.2329	34.3808	-28.2636	-10.0395	30.153	47.8354	-31.4449	-11.5263	25.9238	33.503	-27.6309	-9.46118
Montana	6.567	7.57325	-17.8002	-10.4917	6.54036	8.14732	-17.8532	-9.32998	6.55368	9.63496	-18.1661	-8.27453	8.28975	16.8921	-23.1704	-11.0837	7.56238	19.8581	-23.8508	-10.3332	8.83202	21.1025	-23.9225	-9.34874	11.383	27.2134	-27.6042	-12.5341	11.5488	34.2343	-30.8214	-14.791	11.6823	27.3061	-26.9579	-11.6733
North Dakota	7.21718	7.71313	-9.75635	-5.3047	7.8201	9.74284	-9.84333	-4.97083	7.88006	10.7099	-11.7645	-5.4268	8.55808	19.6494	-20.6143	-6.47542	10.0702	23.6818	-22.3241	-6.74284	11.5105	23.2507	-21.6948	-5.84603	16.3495	32.7093	-31.0837	-8.69962	22.5192	45.4398	-36.6083	-10.9919	18.0924	31.0805	-26.0005	-7.69638
Hawaii	8.25926	7.48148	-11.2469	-5	7.90123	8.46914	-12.1605	-4.18519	9.18519	9.34568	-12.0741	-4.09877	15.6049	17.2593	-16.4691	-5.90123	16.7778	18.2716	-16.2222	-5.50617	19.0864	19.2716	-16.5802	-5.49383	21.7778	27.1728	-20.3333	-7.23457	24.7654	37.2963	-23.2469	-8.82716	22.7654	26.8272	-20.2222	-6.58025
Alberta	11.1249	4.90426	-15.5976	-3.88332	9.88691	4.03485	-13.5378	-3.4362	11.7248	4.33224	-12.4706	-3.50352	20.9548	10.2459	-20.0322	-5.17876	20.2595	9.93942	-18.2447	-4.86911	20.4042	10.274	-19.5915	-5.0736	26.2516	17.3771	-26.1499	-8.23351	29.4694	22.5607	-27.9844	-9.86552	29.6447	16.809	-25.0398	-7.8727
British Columbia	9.14405	7.39159	-11.4598	-7.87427	7.99195	6.16958	-11.186	-7.74526	8.55439	5.79144	-11.9348	-8.43311	15.072	11.1935	-13.3468	-8.11196	13.5656	10.2885	-12.6801	-7.71889	13.0093	8.61635	-13.3225	-8.48925	20.8545	16.4078	-16.8276	-9.4777	22.9083	20.5195	-17.549	-9.923	19.954	14.2428	-16.3273	-9.77799
Nunavut	5.32754	1.76459	-3.4186	-1.32879	5.46143	1.86643	-3.00925	-1.21076	4.89233	1.86888	-3.40759	-1.3126	7.06489	3.11345	-4.468	-1.11308	8.05827	3.16169	-4.09893	-0.971973	7.44686	2.96231	-4.54172	-1.01665	10.9776	5.05397	-7.00939	-1.08214	17.6343	7.44427	-8.14462	-1.04976	14.9716	5.81634	-7.5024	-1.10448
Northwest Territories	9.23246	3.18707	-7.21873	-1.21579	10.5384	2.78245	-5.08542	-1.23885	11.3246	3.15916	-6.06853	-1.20492	15.8143	5.13338	-7.63077	-1.33257	16.7639	4.79618	-6.54278	-1.41807	15.127	4.73221	-7.9076	-1.19743	24.4586	7.66463	-10.0897	-1.37701	31.1115	8.91377	-10.9493	-1.65457	24.9796	7.4722	-11.4291	-1.51803
Yukon Territory	8.06547	2.96051	-7.80655	-2.46758	9.38881	2.59493	-6.68152	-2.49799	8.45048	2.6188	-7.45428	-2.77318	13.9772	4.45428	-9.69335	-2.62175	17.5478	4.71721	-8.966	-2.75248	13.4237	4.27244	-9.22492	-2.55438	21.9054	7.43231	-12.7723	-2.7227	35.3785	9.94277	-14.3913	-3.58543	21.5681	6.41288	-12.9219	-3.26674
Idaho	13.5802	10.5623	-15.8803	-11.9094	12.842	10.9399	-15.0616	-10.967	11.3175	11.3752	-14.8648	-10.0538	14.874	16.7824	-19.2904	-11.6398	12.5565	17.9317	-19.1197	-10.9913	11.7877	18.7993	-20.1032	-11.8914	16.9864	25.1401	-24.1517	-13.6578	14.3146	28.9714	-28.6079	-15.651	14.3369	22.7155	-24.3863	-13.6112
Washington	7.49945	7.98725	-14.4451	-12.8986	6.92738	7.07539	-14.184	-12.5283	6.79213	7.7622	-13.7666	-12.4523	8.51441	12.7084	-20.582	-14.9257	7.82151	12.1353	-20.3331	-15.0593	8.699	12.6619	-20.5432	-16.7079	10.3498	18.9967	-27.9429	-19.5798	11.4889	22.1746	-30.3952	-21.2029	10.7018	17.7356	-27.3647	-20.4728
Arizona	15.4523	16.8109	-7.17928	-13.8201	14.5757	16.975	-7.73816	-13.9727	15.9414	20.3845	-8.38947	-14.6684	20.0141	30.1921	-9.12138	-16.6799	20.1763	31.0276	-9.68224	-17.8414	19.6319	31.5164	-10.2628	-18.1671	26.222	44.1378	-10.1609	-18.2322	25.2984	43.6234	-11.3668	-21.5951	22.4372	37.5691	-10.7911	-19.7836
California	9.68071	13.3745	-10.8867	-12.389	10.2491	14.1525	-10.1888	-11.9402	10.8158	15.1382	-11.5589	-13.3696	13.5425	21.0111	-15.8802	-17.0399	14.024	22.1186	-14.5343	-15.6342	14.5275	22.3641	-15.8833	-17.152	19.0082	28.9591	-19.2288	-21.0595	19.1629	31.2893	-20.36	-21.1692	16.9409	26.5965	-18.115	-19.9734
Colorado	9.91988	8.49745	-8.10925	-8.3831	9.22105	9.62054	-8.84414	-8.27203	9.52658	13.402	-10.8146	-8.48106	11.8616	17.5918	-11.3736	-9.41078	10.3569	18.2822	-13.5044	-11.7367	9.69556	19.1901	-14.9472	-11.5346	15.4807	29.7407	-14.65	-11.8736	15.0801	33.1031	-20.2746	-16.8988	12.2717	26.0025	-17.7444	-14.3456
Nevada	14.0403	15.8407	-8.77751	-11.1114	11.2117	15.4085	-8.27942	-9.80007	8.86151	15.0802	-10.5043	-10.9323	16.0729	23.0385	-12.4162	-11.8296	11.3131	21.7504	-13.3218	-11.5248	9.6043	22.3693	-16.8497	-13.7713	19.033	31.1604	-16.9098	-14.3086	13.4148	29.7025	-20.9306	-16.4957	11.1965	24.7046	-19.7365	-16.4033
New Mexico	12.2551	14.1435	-9.40405	-12.4211	13.6377	17.1119	-10.497	-12.9978	14.5112	19.9927	-11.9102	-14.3661	17.3266	26.4151	-12.3889	-15.5805	20.3712	28.8283	-12.9197	-17.5315	16.8555	26.454	-13.8628	-18.1518	24.779	39.6345	-14.5406	-18.4486	28.4581	43.4986	-16.1242	-22.7692	21.2109	32.0443	-15.1391	-21.1758
Oregon	11.6394	10.7832	-12.9706	-11.4273	10.8372	10.5917	-12.2736	-10.4023	9.6521	10.5071	-11.944	-10.0898	12.7923	16.1148	-17.4909	-11.3153	10.7593	16.2014	-17.3173	-11.1942	10.4325	15.3237	-18.1128	-12.9376	14.1616	22.556	-23.637	-14.3546	12.8066	25.751	-27.8106	-16.5008	12.6871	20.0278	-23.9849	-15.6612
Utah	13.2288	12.8248	-10.7252	-10.4562	11.4204	13.6066	-11.0093	-9.51416	9.57611	14.8513	-12.577	-9.90708	13.4049	20.2889	-15.4168	-12.7181	11.0442	19.9456	-16.6544	-12.7434	9.70885	20.6973	-19.1155	-13.9031	16.0624	30.6748	-18.9513	-16.1925	14.108	31.1274	-22.2053	-18.6491	12.023	25.5633	-20.7164	-16.4496
Wyoming	10.0166	7.79911	-13.8628	-8.29627	9.15057	8.88109	-14.3571	-7.58482	7.99959	10.8393	-16.1765	-7.57346	11.1615	16.5349	-17.7045	-9.11567	8.88839	18.8616	-18.873	-9.34659	8.74554	20.9489	-21.11	-9.80519	13.3933	27.1818	-20.92	-10.3466	10.4911	32.8462	-25.9399	-14.0097	10.1307	24.5329	-23.0215	-10.7123
Arkansas	8.10193	8.04315	-10.0045	-6.76637	8.62202	10.9085	-10.4799	-6.26414	9.66071	12.3862	-12.1652	-6.49405	12.6503	18.6905	-14.0417	-7.8683	13.8103	20.0231	-16.4085	-9.59524	14.4368	19.9561	-15.3289	-11.4866	15.4531	22.5945	-15.8162	-12.6994	19.2359	36.971	-21.9896	-16.2619	17.4129	24.5365	-17.8884	-14.3906
Iowa	6.53019	10.9336	-8.60053	-3.53086	8.54479	12.6543	-8.9436	-3.99934	9.41141	14.0889	-9.74187	-4.22163	18.2648	25.9635	-12.0989	-5.48507	20.4267	29.5362	-12.8806	-5.74585	21.6682	30.4718	-14.3172	-5.64831	25.9005	41.3869	-16.3444	-6.99735	30.862	48.7605	-19.6702	-9.82216	26.6689	40.7611	-15.9774	-6.98474
Kansas	6.03718	8.99482	-5.87059	-6.36612	7.70071	11.8744	-6.856	-6.16612	9.08047	15.112	-7.82871	-7.04894	12.7727	21.688	-9.07859	-7.11388	12.5642	22.2245	-10.4838	-9.50118	13.0193	22.3308	-10.3308	-10.4522	16.5831	31.2136	-11.9125	-10.6941	20.0273	37.1802	-15.9986	-17.4744	15.8381	26.8598	-11.9864	-11.8405
Missouri	8.00777	5.15871	-6.88624	-10.626	9.47891	7.64095	-8.70311	-8.9212	10.6215	9.33796	-8.84517	-8.25916	14.4251	18.3774	-12.4018	-5.80355	16.384	22.0516	-14.1526	-5.95838	17.1454	22.5966	-14.0555	-6.17481	19.3274	26.0361	-16.5683	-7.26693	20.7248	32.2947	-22.1054	-10.8768	19.0599	26.6171	-16.3158	-6.69145
Nebraska	7.03137	7.41484	-8.06624	-6.06823	8.02092	9.60309	-8.21713	-5.7007	8.5239	13.1021	-8.5991	-5.10159	12.8755	21.4128	-10.1569	-5.73904	13.0762	22.6345	-10.623	-6.26444	13.5558	24.8635	-10.6559	-6.98207	16.8386	36.9328	-12.242	-7.28137	19.4163	41.4258	-14.8147	-11.1663	18.8406	34.4417	-12.1818	-8.51295
Oklahoma	7.40834	10.0774	-5.80681	-6.69484	8.45664	13.1641	-6.91712	-7.86334	9.43139	15.3266	-8.15971	-9.50384	10.9555	17.6526	-9.43194	-11.9544	11.6932	19.0686	-11.6992	-14.6498	12.2151	18.0862	-12.6361	-15.5763	15.2838	24.8732	-13.6328	-18.337	23.4512	36.0104	-17.6054	-23.9023	15.7448	23.8935	-14.3321	-17.9682
South Dakota	5.96513	6.4669	-12.7312	-6.85851	7.04042	8.37797	-12.8742	-6.24811	7.70945	10.8984	-13.7928	-6.20515	13.5023	21.1854	-19.8307	-7.07276	14.8292	24.8792	-20.5008	-7.18191	15.9914	25.9414	-20.1915	-6.63669	19.9763	34.1693	-24.6347	-8.54573	22.283	43.9808	-25.7852	-11.5988	21.7342	34.758	-23.623	-8.41738
Louisiana	8.83575	14.9002	-11.8937	-11.3704	8.86957	18.2118	-10.2979	-13.2657	10.4501	21.1304	-11.5346	-14.2496	13.5862	30.4525	-13.4452	-15.9211	14.2746	32.5902	-14.0797	-17.8728	13.4694	34.4686	-13.8494	-20.6812	17.2134	39.2802	-13.4171	-19.2303	20.1473	52.711	-17.0298	-22.6779	18.43	43.901	-16.2174	-21.0443
Texas	9.77737	14.4827	-6.66391	-11.6551	11.8415	17.7904	-7.7933	-14.1204	13.0848	20.8027	-9.24107	-16.4613	15.3893	25.5316	-9.44113	-17.0497	16.4431	27.8529	-10.8339	-19.2781	16.3284	27.5665	-11.8063	-20.4189	21.722	36.9727	-12.1734	-22.0751	24.451	43.9618	-15.1511	-25.0422	18.6812	38.0671	-13.8005	-21.986
Guantanamo Bay	7.11111	12.1111	-13.5556	-7.11111	7.22222	13.7778	-10.4444	-9.77778	9.88889	13.7778	-12.2222	-12.5556	12.5556	26.3333	-16.4444	-11.5556	14.8889	32	-16.3333	-11.6667	11.3333	30.5556	-12.2222	-16.2222	16.5556	37.5556	-13.3333	-11.7778	16.8889	57.6667	-16.1111	-14.5556	14.5556	43.1111	-17	-17.1111
Connecticut	15.359	14.3846	-6.60684	-10.5726	17.6068	16.4957	-7.78632	-10.8462	19.3248	16.7863	-8.52991	-11.9316	22.5641	25.735	-11.8803	-9.00855	23.9316	29.8974	-14.5726	-9.49573	24.3761	28.1197	-13.4701	-9.45299	27.0598	35.8034	-16.4444	-7.75214	30.9316	48.8803	-24.5043	-9.5641	27.2308	35.8718	-18.9316	-8.67521
Massachusetts	13.0887	15.4335	-7.41379	-9.62562	15.4335	17.9163	-8.35468	-10.8867	18.2118	19.6897	-9.02956	-11.5665	22.0788	29.6798	-14.5813	-11.2759	25.266	33.5862	-16.468	-12.532	24.8867	32.7094	-15.266	-12.5813	28.5961	39.5025	-18.5567	-11.8621	31.468	52.399	-25.665	-13.2562	27.867	41.2365	-20.4926	-12.33
New Hampshire	15.6452	12.1653	-9.64113	-7.26613	18.2379	15.5968	-11.75	-9.49194	18.6532	16.1452	-12.004	-9.5	25.2298	27.129	-19.1048	-10.7218	30.0565	31.621	-21.879	-12.871	31.3508	32.1694	-21.1452	-12.9234	33.4395	41.004	-25.7137	-13.0968	37.6129	55.9556	-30.871	-14.9355	35.3669	43.5444	-26.3871	-13.5444
Rhode Island	13.0857	14.2571	-7.54286	-11.3143	15.8	17.2857	-8.88571	-11.9143	18.2571	16.8857	-9.34286	-13.0857	21.4286	26.1143	-14.0571	-12.5429	25.4857	31.4571	-16.1714	-12.8	25.3143	28.4857	-15.0286	-13.5714	29.6286	35.3143	-18.2571	-13.0571	30.5429	48.1143	-26.0857	-13.7429	28.0571	37.4	-20.7143	-13.5429
Vermont	15.6368	12.287	-13.6009	-7.43049	17.2063	17.1345	-16.7399	-9.50224	17.5874	17.5022	-16.9103	-9.3139	24.6816	28.5874	-24.278	-11.9103	28.0269	34.0404	-27.7175	-13.1525	30.9013	33.4215	-26.3274	-13.0583	33.583	43.4933	-32.2242	-14.5067	39.8206	60.8251	-37.6547	-16.4036	37.7399	44.7982	-32.0987	-15.1928
Alabama	4.6711	8.14117	-11.425	-8.29786	5.26534	11.8817	-10.983	-9.16334	5.1493	14.3082	-11.473	-9.49741	8.49741	16.7945	-14.2956	-12.7894	11.8027	21.6711	-12.238	-13.2875	10.575	20.7184	-11.2506	-14.7701	12.8825	23.1412	-14.3001	-15.9505	14.5418	44.6933	-17.0362	-16.5647	12.5432	30.561	-14.6223	-16.5669
Florida	8.87995	13.5275	-8.66986	-24.4444	9.51596	15.0971	-9.15326	-26.4642	9.96871	16.0983	-9.22222	-25.9789	12.5562	28.4304	-12.4808	-31.712	12.9304	28.3691	-12.2095	-30.2356	14.0983	29.9266	-12.7848	-30.8448	17.8506	36.516	-13.9834	-32.6564	19.8391	42.887	-15.3863	-33.4489	17.9215	35.9521	-14.357	-32.3461
Georgia	5.07322	8.01927	-8.99101	-11.0289	5.52023	9.78356	-9.1824	-12.1997	5.62299	11.9833	-9.99615	-11.1008	9.03468	17.1162	-12.7264	-15.0039	11.1175	20.6352	-12.1233	-15.578	11.9647	19.5922	-12.0186	-17.3398	13.377	21.6069	-14.2434	-18.2537	17.6628	39.9159	-21.1445	-19.6005	14.8735	30.1728	-16.0572	-17.745
Mississippi	5.77492	9.46429	-12.9784	-8.3397	6.03488	13.1412	-11.1869	-9.10465	6.31561	13.745	-11.343	-9.85382	10.5174	18.4942	-15.2234	-12.8306	12.9743	24.0723	-13.9942	-13.2575	11.1487	21.5706	-13.956	-16.3355	14.8098	25.5291	-14.5033	-15.7159	16.2002	47.6437	-17.7517	-16.593	13.1993	32.0017	-16.8223	-18.3331
South Carolina	4.86999	8.6367	-10.7825	-9.06197	5.66829	9.72053	-11.39	-10.8153	5.58202	12.5152	-11.7618	-9.69745	10.1628	15.0012	-15.0012	-16.2588	11.6075	16.6221	-14.9222	-16.6999	12.836	15.6744	-13.8019	-19.6671	14.1677	18.8323	-16.2722	-20.5322	20.5043	40.3791	-25.2236	-21.1191	15.9344	33.3657	-21.6792	-17.0826
Illinois	9.37448	7.41054	-5.18655	-10.3128	10.8343	9.17614	-7.09154	-9.53745	12.0326	10.6103	-7.16782	-9.53051	17.5423	18.6255	-11.9945	-8.13037	20.7393	23.4196	-14.0444	-7.61512	22.5936	24.0673	-14.4986	-7.9792	25.9667	29.3065	-17.4272	-8.33703	24.9965	38.5104	-21.672	-10.7961	24.5229	30.7205	-17.3003	-8.63731
Indiana	9.48586	8.1089	-6.92147	-11.6503	10.8942	10.3183	-8.18325	-10.3215	11.1717	11.3874	-8.44607	-9.72147	15.5487	18.577	-13.1675	-8.18848	18.3665	23.8387	-16.5476	-8.36754	20.0398	26.1267	-17.3518	-8.38115	23.7026	29.8607	-19.1372	-8.05026	24.2513	41.3592	-25.6545	-9.81047	23.2482	32.0325	-21.5634	-8.67853
Kentucky	5.60969	6.82541	-7.74497	-8.8574	6.76143	8.29616	-9.75503	-8.02925	5.66453	8.73492	-10.6993	-7.47258	9.39945	14.9735	-14.3144	-5.93053	12.17	19.5046	-17.2139	-7	13.6161	20.4506	-17.8684	-7.13437	13.8903	22.6718	-18.2578	-7.13985	16.5247	33.5128	-24.8053	-11.8154	15.6984	26.2112	-20.9424	-7.83455
North Carolina	5.07635	6.87725	-11.0202	-7.6991	5.61901	9.05614	-11.3391	-7.46482	5.45734	10.5052	-12.2118	-8.38174	9.76198	16.8698	-16.8001	-8.93189	12.5988	19.3952	-17.2889	-9.95509	13.9251	19.8915	-18.0876	-12.4573	15.1699	23.3196	-19.2118	-12.976	22.1826	36.735	-26.4042	-16.0621	17.0045	31.0981	-23.8016	-13.4349
Ohio	10.5299	7.20513	-8.73675	-14.0684	12.2769	10.0436	-10.0171	-12.5359	12.3205	10.7556	-10.1709	-12.594	16.9188	18.165	-14.4462	-10.547	18.3846	23.5154	-17.0692	-10.6	21.0385	26.0684	-18.112	-10.7496	23.6479	30.2333	-19.9786	-9.56154	25.7427	44.4838	-28.1872	-10.9966	23.4923	33.8966	-23.7487	-10.5479
Tennessee	2.96296	5.35897	-9.63153	-6.78727	4.43495	7.86895	-10.4122	-5.09022	3.86895	7.20798	-12.0665	-5.40551	7.61443	13.3637	-15.6866	-5.23457	10.6543	19.5432	-16.9326	-5.51757	11.359	19.5983	-16.5726	-6.52612	11.0826	20.8338	-17.2355	-7.54986	14.6268	32.434	-23.3875	-11.9269	13.6895	23.6591	-18.4046	-8.585
Virginia	6.63538	5.80144	-8.79332	-8.73556	6.92509	7.60379	-9.34657	-7.91877	6.69134	8.44314	-10.3249	-8.37455	10.8791	16.4829	-13.9359	-5.56047	13.2229	20.8511	-16.3935	-5.84928	14.7274	22.0027	-17.3421	-7.0352	15.8899	26.722	-17.9233	-6.19675	20.3231	37.6047	-26.2825	-9.98917	17.1606	31.9901	-23.2437	-7.76986
Wisconsin	8.92298	9.08385	-9.88261	-5.98696	10.405	12.1075	-14.0634	-6.23106	10.946	13.5708	-15.8851	-6.76211	14.3037	24.7447	-23.2062	-8.17516	17.387	29.2621	-25.8733	-8.76832	18.3012	28.4894	-26.8161	-8.89379	21.5615	35.9634	-29.9509	-10.3099	29.0242	52.1379	-33.5025	-11.9348	22.387	36.9199	-30.4453	-10.1453
West Virginia	8.38412	7.49757	-10.5818	-12.6483	9.61588	8.35008	-11.3501	-11.8671	8.96434	9.11183	-12.3355	-11.8979	13.5348	14.7974	-14.9903	-9.1637	15.1329	18.9222	-16.1686	-8.23825	16.5041	21.2172	-17.4182	-8.22042	17.8006	24.6143	-18.8947	-7.72447	22.2156	39.0146	-27.1021	-8.58995	21.3031	31.9028	-22.1442	-7.92707
Delaware	7.64062	6.64062	-6.89062	-7.20312	7.10938	8	-8.57812	-7.9375	6.1875	8.70312	-9.23438	-8.51562	8.3125	18.2031	-14.6875	-8.125	11.3438	23.8281	-16.5625	-8.54688	12.5625	22.9062	-17.8125	-9.8125	11.8438	27.8594	-19.9375	-10.4844	19.4688	40.25	-26.4844	-12	16.2031	28.5938	-21.8594	-12.1562
District of Columbia	11.3818	3.72727	-13.7727	-4.97273	13.4273	4.43636	-12.5636	-4.35455	14.5455	5.15455	-14.5727	-5.2	25.0636	11.6091	-17.7182	-6.16364	28.8727	13.6909	-20.8182	-6.70909	27.2455	14.3909	-20.6364	-6.85455	35.1909	21.5636	-27.2727	-9.01818	44.6636	30.1091	-34.3	-12	36.9636	22.9182	-28.3545	-9.7
Maryland	9.64906	8.17736	-7.10189	-9.63774	9.30566	10.7962	-7.76981	-8.4566	9.43774	11.1698	-8.52075	-9.27925	12.5283	20.2453	-13.4943	-7.45283	15.0981	24.5094	-16.8264	-8.49811	15.8642	23.2264	-17.0189	-10.0038	17.0151	29.4038	-19.4792	-9.51321	22.3623	40.7887	-25.0868	-12.2717	18.9509	31.3094	-22.3434	-10.7811
New Jersey	12.6532	9.05405	-6.21622	-11.1667	13.2477	10.1802	-7.09009	-9.26577	13.0045	10.7027	-7.36486	-10.6216	14.536	18.0676	-12.2162	-7.79279	17.4189	23.3153	-15.4775	-8.06306	17.3018	21.7252	-15.8018	-9.4009	18.6441	29.5676	-18.1306	-8.53604	24.2838	40.3514	-25.464	-10.9054	21.6261	30.018	-20.1261	-10.1126
New York	11.8687	11.4149	-12.3155	-10.0389	13.3495	14.3621	-14.2891	-10.5886	14.4712	15.1209	-15.05	-11.2731	20.5393	26.1237	-20.9319	-11.9701	23.6088	31.0431	-23.9743	-12.8145	26.5163	29.7338	-22.943	-13.5115	29.3919	40.2397	-27.1362	-13.7498	32.9653	55.9625	-34.1564	-15.5038	30.9145	41.9201	-28.5671	-13.9847
Pennsylvania	13.4597	7.42882	-8.80703	-12.6981	15.0412	9.97256	-9.83276	-11.5943	15.8285	10.9245	-10.4237	-12.0017	20.7847	19.084	-14.807	-11.7376	21.9503	23.1329	-17.8516	-11.6527	23.8593	23.1072	-17.837	-11.9314	26.512	31.4477	-19.9262	-10.8945	28.548	44.717	-28.6261	-12.2178	26.741	35.3062	-23.2633	-11.1492
Ontario	11.2148	4.10922	-12.0137	-5.56921	13.3906	5.33701	-11.9726	-5.85578	14.5855	5.89752	-12.6347	-6.07	23.3134	12.6529	-15.7372	-6.62677	27.1103	14.5117	-17.9176	-7.3649	27.9621	14.883	-18.0675	-8.11128	34.196	22.0753	-24.9032	-9.45531	44.0356	33.4675	-33.5044	-12.3665	38.8914	24.3348	-26.1937	-10.736
Quebec	9.60111	3.04284	-9.87457	-4.38189	11.4684	3.86778	-9.3113	-4.23622	12.8491	4.06598	-10.897	-4.69398	19.3098	8.79653	-12.3698	-4.52729	21.852	10.1499	-12.7235	-4.86482	22.7898	9.28216	-15.1702	-5.74822	29.2866	16.5441	-17.5438	-5.32316	39.9621	26.6697	-22.364	-7.15799	31.6457	18.343	-19.8352	-6.83496
Maine	13.1419	10.4903	-11.5419	-6.27527	15.3548	13.0538	-14.4065	-7.10108	16.9634	13.8473	-15.6968	-7.33333	23.1194	25.0817	-23.386	-9.08172	26.7484	29.7957	-26.8043	-10.9419	29.4108	29.0882	-26.4075	-11.1753	32.028	39.7968	-33.3763	-12.6613	39.7108	51.8161	-37.6419	-14.8387	34.6667	39.7903	-32.5237	-13.5892
Michigan	10.5623	7.96855	-10.6319	-8.75849	12.6679	11.6918	-13.6021	-9.4717	13.5803	13.0386	-14.3493	-10.278	18.0579	23.14	-22.46	-12.3044	19.9052	27.7015	-25.652	-12.8633	20.8562	27.3803	-25.4369	-13.117	24.3627	35.9174	-30.6025	-15.0579	29.6889	52.9509	-36.9933	-16.2117	26.1371	38.46	-30.657	-14.9468
New Brunswick	14.3957	6.63795	-8.94482	-8.15612	15.148	7.8183	-11.9098	-8.43742	18.14	10.7833	-16.0956	-10.0162	22.6124	23.2746	-23.8264	-11.035	24.1642	25.4226	-27.6555	-12.4576	27.9785	26.3755	-28.4441	-13.5774	29.0848	39.7133	-35.852	-15.3432	35.8802	55.8331	-39.2907	-18.1669	34.3028	38.4118	-34.7295	-17.3472
Nova Scotia	12.0451	11.33	-13.4358	-11.3822	11.9337	11.9633	-13.4062	-10.763	14.0889	12.3921	-14.5994	-11.9281	16.2567	28.0169	-22.7405	-14.701	15.7955	28.5811	-22.866	-14.7475	17.9408	26.4866	-22.7687	-15.7659	22.8773	40.615	-28.5078	-18.5021	27.8491	46.7377	-29.268	-20.2243	24.0889	38.8251	-28.1255	-19.1269
Newfoundland	5.8338	4.3826	-11.5183	-8.02951	6.58916	4.63682	-9.17201	-6.90769	7.69004	5.22799	-10.1826	-6.67894	12.4288	10.7864	-11.425	-5.41236	14.3763	11.2719	-9.69382	-5.25826	13.6396	9.71854	-12.5483	-6.657	23.4346	18.9274	-16.2113	-6.18411	33.2305	25.7506	-16.7975	-7.53266	22.9687	15.9776	-16.3443	-7.26204
Prince Edward Island	13.5385	7.38462	-14.6923	-15.1231	11.4769	9.07692	-17.0615	-15.5846	11.7538	11.0769	-18.5538	-16.0615	19.7231	25.1846	-29.0615	-17.3231	19.3077	29.8154	-30.9692	-19.0769	18.9231	27.9846	-28.6462	-19.5385	26.1538	47.7385	-33.8769	-21.0615	29.5846	64.5846	-36.5692	-23.5231	24.8923	46.3538	-33.9538	-20.9538
Alaska	6.95125	5.03767	-7.42071	-3.63998	7.56364	4.67182	-6.53015	-3.45739	7.29369	5.27731	-7.87232	-3.55349	13.1201	8.85103	-10.0999	-3.97274	14.8581	8.71261	-9.13796	-3.73005	13.1382	8.65165	-10.0962	-3.73363	21.3012	13.5679	-13.7647	-4.94475	28.9101	17.0547	-14.9865	-5.4865	20.2787	14.4598	-14.7552	-5.22717
